# Supplementary material for: A Prevalent Variant in PPP1R3A Impairs Glycogen Synthesis and Reduces Muscle Glycogen Content in Humans and Mice
Source: PubMed Central journal article supplement (PMC2214798; doi:10.1371/journal.pmed.0050027), 2008-01-29
Supplement: pmed.0050027.sg001.pdf [file pmed.0050027.sg001.pdf]

### Targeting vector

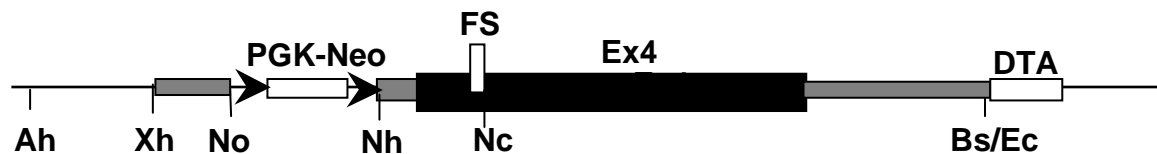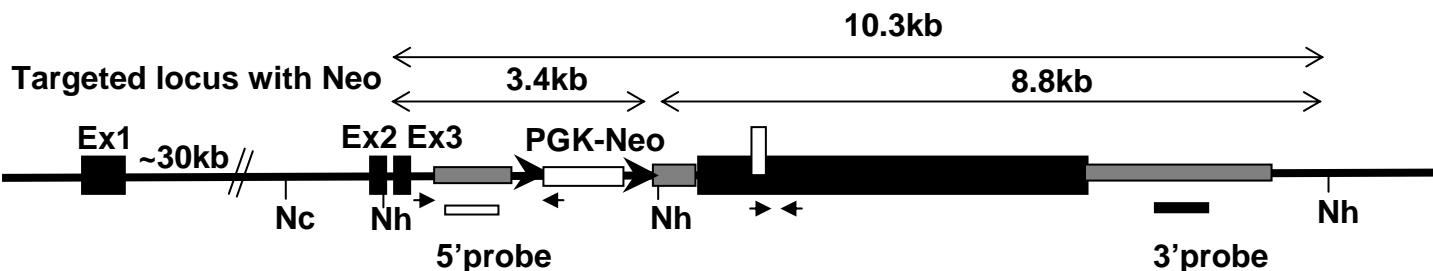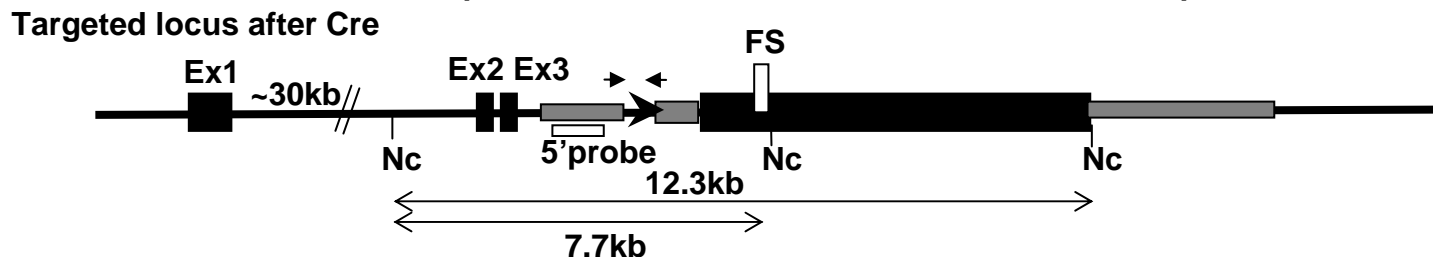

### Human PPP1R3A

### Mouse PPP1R3A

WT: 1980 AGTCAGGGAAAATCAAGAGAGAATAAG

WT: 1908 ACCCAGTCAGAAACAAGTGAGACTCAA

WT: 660 Ser Gln Gly Lys Ser Arg Glu Asn Lys

WT: 636 Thr Gln Ser Glu Thr Ser Glu Thr Glu

FS: 1980 AGTCGGAAAATCAAGAGAGAATAAGAC

FS: 1908 ACCCGGAAAATCAAGAGAGAATAAGACCATGG

FS: 660 Ser Arg Lys Ile Lys Arg Glu Stop 668

FS: 636 Thr Arg Lys Ile Lys Arg Glu Stop 643
